# Supplementary material
Source: HighWire-hosted journal article supplement (https://openres.ersjournals.com/content/4/3/00054-2018)
Supplement: inline-supplementary-material-1 [file inline-supplementary-material-1.pdf]

## ONLINE DATA SUPPLEMENT

### Determinants and Outcomes of Change in Physical Activity in COPD

Ana Kantorowski, MPH<sup>1</sup>, Emily S. Wan, MD, MPH<sup>1,2,3,4</sup>, Diana Homsy, BS<sup>1</sup>, Reema Kadri, MLIS<sup>5</sup>, Caroline R. Richardson, MD<sup>5</sup>, and Marilyn L. Moy, MD, MSc<sup>1,2,4</sup>

<sup>1</sup>Pulmonary and Critical Care Medicine Section, VA Boston Healthcare System, Boston, MA, USA; <sup>2</sup>Department of Veterans Affairs, Rehabilitation Research and Development Service, Washington DC, USA; <sup>3</sup>Channing Division of Network Medicine, Brigham & Women's Hospital, Boston, MA, USA; <sup>4</sup>Harvard Medical School, Boston, MA, USA; and <sup>5</sup>Department of Family Medicine, University of Michigan, Ann Arbor, MI, USA

#### Correspondence should be addressed to:

Marilyn L. Moy, MD, MSc  
VA Boston Healthcare System  
Pulmonary and Critical Care Section  
1400 VFW Parkway, Mail Code 111PI  
West Roxbury, MA 02132  
E-mail: [marilyn.moy@va.gov](mailto:marilyn.moy@va.gov)  
Telephone: 857-203-6622  
Facsimile: 857-203-5670

## METHODS

Generalized linear regression models (PROC GLM, SAS 9.4, SAS Institute; Cary, NC) explored baseline characteristics, chosen *a priori* to possibly impact PA, as predictors of overall change in daily step count, adjusting for baseline daily step count and PA promotion group. Spearman correlation coefficients examined relationships between changes in daily step count and changes in COPD measures. Statistical significance was defined as  $p < 0.05$ .

## RESULTS

### *Baseline predictors of change in daily step count*

In univariate linear regression models, baseline daily step count predicted change in daily step count ( $p=0.0003$ , 95% CI [-554,-168]), with a higher baseline step count predicting significantly less improvement in PA (table S1). Other significant predictors of change in daily step count included self-reported diagnosis of depression, social support (domains of emotional support, affectionate support and positive interaction), use of supplemental oxygen, and enrollment in Summer and Fall, independent of baseline daily step count and PA promotion group (table S1). Neither lung function, CRP and IL-6, comorbidities of cardiovascular disease or back pain, history of AE prior to study entry, occurrence of AE, pulmonary ER visit, or hospitalization during the study, nor level of adherence to the Omron pedometer predicted change in daily step counts.

### *Effects of changes in daily step count on changes in COPD measures*

Among participants in both PA promotion groups combined, increases in daily step count were significantly correlated with increases in FEV<sub>1</sub> % predicted ( $r=0.286$ ,  $p=0.0057$ ) and

6MWT distance ( $r=0.400$ ,  $p<0.0001$ ), (table S2). Increases in daily step count were significantly correlated with decreases in CRP ( $r=-0.247$ ,  $p=0.017$ ) and IL-6 ( $r=-0.360$ ,  $p=0.0004$ ), (table S2). There was no significant correlation between change in daily step count and change in mMRC dyspnoea score, SGRQ-TS, BDI-II score, and social support (table S2).

**TABLE S1** Predictors of change in daily step count

| Predictor                                                            | Effect on change in daily step count <sup>*</sup> | 95% confidence interval | p-value |
|----------------------------------------------------------------------|---------------------------------------------------|-------------------------|---------|
| Baseline daily step count <sup>†</sup><br>(per 1,000 steps increase) | -361                                              | -554; -168              | 0.0003  |
| Diagnosis of depression<br>(Ref.=no diagnosis)                       | -801                                              | -1530; -71.9            | 0.032   |
| MOS Social support                                                   | 398                                               | 89.0; 707               | 0.012   |
| Emotional support                                                    | 287                                               | 5.89; 568               | 0.046   |
| Tangible support                                                     | 162                                               | -94.4; 418              | 0.213   |
| Affectionate support                                                 | 474                                               | 232; 716                | 0.0002  |
| Positive interaction                                                 | 375                                               | 66.9; 683               | 0.018   |
| Oxygen use (Ref.=no oxygen)                                          | -849                                              | -1677; -21.9            | 0.044   |
| Season of enrollment (Ref.=Spring)                                   |                                                   |                         |         |
| Spring (March-May)                                                   |                                                   |                         |         |
| Summer (June-August)                                                 | -1414                                             | -2308; -519             | 0.002   |
| Fall (September-November)                                            | -1371                                             | -2199; -542             | 0.002   |
| Winter (December-February)                                           | -531                                              | -1664; 601              | 0.354   |

<sup>\*</sup>Effects on change in daily step count are the model coefficients as determined by 9 separate generalized linear regression models, adjusted for baseline daily step count and PA promotion group, except where noted.

<sup>†</sup>Model adjusts for PA promotion group only.

MOS: Medical Outcomes Study; Ref.: reference group.

**TABLE S2** Relationship between change in daily step count and change in COPD measures

| Change in COPD measure       | Spearman correlation coefficient | p-value |
|------------------------------|----------------------------------|---------|
| FEV <sub>1</sub> % predicted | 0.286                            | 0.0057  |
| 6MWT distance (m)            | 0.400                            | <0.0001 |
| CRP (mg/L)                   | -0.247                           | 0.017   |
| IL-6 (ng/mL)                 | -0.360                           | 0.0004  |
| mMRC dyspnoea score          | -0.111                           | 0.287   |
| SGRQ-TS                      | -0.177                           | 0.092   |
| BDI-II depression score      | -0.113                           | 0.282   |
| MOS social support           | -0.034                           | 0.751   |
| Emotional support            | -0.023                           | 0.830   |
| Tangible support             | -0.001                           | 0.992   |
| Affectionate support         | -0.128                           | 0.228   |
| Positive interaction         | -0.080                           | 0.449   |

BDI-II: Beck Depression Inventory; CRP: C-reactive protein; IL-6: interleukin-6; MOS: Medical Outcomes Study; mMRC: modified Medical Research Council; 6MWT: 6-minute walk test; SGRQ-TS: St. George's Respiratory Questionnaire-Total Score.
